# Supplementary material for: Formation and sink of glyoxal and methylglyoxal in a polluted subtropical environment: observation-based photochemical analysis and impact evaluation
Source: Copernicus journal article supplement (doi:10.5194/acp-20-11451-2020), 2020-10-07
Supplement: Supplementary file 1 [file acp-20-11451-2020-supplement.pdf]

Supplement of Atmos. Chem. Phys., 20, 11451–11467, 2020  
<https://doi.org/10.5194/acp-20-11451-2020-supplement>  
© Author(s) 2020. This work is distributed under  
the Creative Commons Attribution 4.0 License.

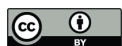

*Supplement of*

## **Formation and sink of glyoxal and methylglyoxal in a polluted subtropical environment: observation-based photochemical analysis and impact evaluation**

**Zhenhao Ling et al.**

*Correspondence to:* Zhe Wang (z.wang@ust.hk) and Xuemei Wang (eciwxm@jnu.edu.cn)

The copyright of individual parts of the supplement might differ from the CC BY 4.0 License.

## Section S1 The supplementary Tables and Figures in the manuscript.

Table S1. Model scenarios used for gas-phase Mgly.

| Model scenarios | Description                                                                                                                                        |
|-----------------|----------------------------------------------------------------------------------------------------------------------------------------------------|
| INITIAL         | Default MCMv3.2, without considering the reversible and irreversible uptake of Mgly and the gas-particle partitioning of other oxidation products. |
| Scenario M1     | As INITIAL, and considers Mgly partitions into the liquid-phase, without considering the monomers pool 1 and oligomers pool 2.                     |
| Scenario M2     | As Scenario M1, and considers surface uptake by aerosols of Mgly with the uptake coefficient of $2.6 \times 10^{-4}$ (Pye et al., 2017).           |

Table S2. The selected NMHC species for the input of PBM-MCM model

| No. | Compound           | No. | Compound               |
|-----|--------------------|-----|------------------------|
| 1   | Ethane             | 23  | 1-Butene               |
| 2   | Propane            | 24  | cis-2-Butene           |
| 3   | i-Butane           | 25  | 1-Pentene              |
| 4   | n-Butane           | 26  | trans-2-Pentene        |
| 5   | i-Pentane          | 27  | Isoprene               |
| 6   | n-Pentane          | 28  | cis-2-Pentene          |
| 7   | 2,2-Dimethylbutane | 29  | 1-Hexene               |
| 8   | 2,3-Dimethylbutane | 30  | 1,3-Butadiene          |
| 9   | 2-Methylpentane    | 31  | Benzene                |
| 10  | 3-Methylpentane    | 32  | Toluene                |
| 11  | n-Hexane           | 33  | Ethylbenzene           |
| 12  | 2-Methylhexane     | 34  | m/p-Xylene             |
| 13  | Cyclohexane        | 35  | o-Xylene               |
| 14  | 3-Methylhexane     | 36  | Styrene                |
| 15  | n-Heptane          | 37  | i-Propylbenzene        |
| 16  | n-Octane           | 38  | n-Propylbenzene        |
| 17  | n-Nonane           | 39  | m-Ethyltoluene         |
| 18  | n-Decane           | 40  | p-Ethyltoluene         |
| 19  | Ethene             | 41  | 1,3,5-Trimethylbenzene |
| 20  | Propene            | 42  | o-Ethyltoluene         |
| 21  | Ethyne             | 43  | 1,2,4-Trimethylbenzene |
| 22  | trans-2-Butene     | 44  | 1,2,3-Trimethylbenzene |

Table S3. The mean measured OH and HO<sub>2</sub> concentrations in the previous studies and our model results (in molecule·cm<sup>-3</sup>)

| Location             | season | OH (×<br>10 <sup>6</sup> ) | HO <sub>2</sub> (×<br>10 <sup>8</sup> ) | year | Reference                  |
|----------------------|--------|----------------------------|-----------------------------------------|------|----------------------------|
| PRD, China           | Summer | 15                         | -                                       | 2006 | (Hofzumahaus et al., 2009) |
| Shanghai, China      |        | 10.2                       | -                                       | 2013 | (Nan et al., 2017)         |
| north-western Greece |        | 8                          | 4.7                                     | 1997 | (Creasey et al., 2001)     |
| PRD, China           | Autumn | 4.5                        | 3.0                                     | 2014 | (Tan et al., 2019)         |
| Tokyo, Japan         | Winter | 1.5                        | -                                       | 2004 | (Kanaya et al., 2007)      |
| New York, America    |        | 1.4                        | -                                       | 2004 | (Ren et al., 2006)         |
| Beijing, China       |        | 1.5                        | 0.3                                     | 2017 | (Ma et al., 2019)          |
| PRD, China           |        | 1.6                        | 0.3                                     | 2017 | This study                 |

Table S4. Estimated uncertainties of model reaction rate constant and input parameters.

| Input parameter                       | Uncertainty factor |
|---------------------------------------|--------------------|
| j <sup>a</sup>                        | ×1.1               |
| τD                                    | ×2                 |
| T                                     | ×1.005             |
| P                                     | ×1.005             |
| OH                                    | ×1.2               |
| H <sub>2</sub>                        | ×1.2               |
| CO                                    | ×1.05              |
| NO                                    | ×1.07              |
| NO <sub>2</sub>                       | ×1.13              |
| O <sub>3</sub>                        | ×1.05              |
| H <sub>2</sub> O                      | ×1.1               |
| HONO                                  | ×1.1               |
| CH <sub>4</sub>                       | ×1.04              |
| Ethane <sup>b</sup>                   | +0.2 ppb           |
| Ethene <sup>b</sup>                   | +0.7 ppb           |
| Ethyne <sup>b</sup>                   | +1.2 ppb           |
| C <sub>3</sub> -C <sub>10</sub> NMHCs | ×1.2               |
| K <sub>i</sub> <sup>c</sup>           | ×1.3               |

<sup>a</sup> The errors of the measured photolysis frequencies are assumed to be correlated since they were derived from the same measurement of the solar actinic flux. <sup>b</sup> Campaign averaged values were applied for ethane, ethene, and ethyne, so that the standard deviation of the canister samples were propagated as uncertainties rather than the measurement accuracy. <sup>c</sup> All the reaction constants of non-photolytic reactions in MCM v3.2 are estimated to have 30% accuracy (1σ)(Li et al., 2014; Lu et al., 2012).

Table S5. Linear regression coefficients and relative contributions of primary, secondary, and background sources of Gly and Mgly.

|      | Linear regression coefficients |           |           | Source Contribution |         |           |      |
|------|--------------------------------|-----------|-----------|---------------------|---------|-----------|------|
|      | $\beta_0$                      | $\beta_1$ | $\beta_2$ | Background          | Primary | Secondary | R    |
| Gly  | 0.001                          | 0.066     | 0.042     | 0.40%               | 3.46%   | 96.14%    | 0.77 |
| Mgly | 0.002                          | 0.108     | 0.081     | 0.05%               | 3.51%   | 96.44%    | 0.75 |

To estimate the contributions of primary sources to measured Gly and Mgly, a correlation-based source apportionment method suggested by previous studies was used, as described by equation 1 (Friedfeld et al., 2002; Yuan et al., 2013).

$$[\text{dicarbonyls}] = \beta_0 + \beta_1[\text{C}_2\text{H}_2] + \beta_2[\text{O}_3] \quad (1)$$

where  $\beta_0$ ,  $\beta_1$ , and  $\beta_2$  are the coefficients derived from the linear regression analysis. For every unit increase in  $\text{C}_2\text{H}_2$  concentration there is a  $\beta_1$  unit increase in dicarbonyls. Similarly, for every unit increase in  $\text{O}_3$  concentration there is a  $\beta_2$  unit increase in dicarbonyls.  $\beta_0$  can be considered the background dicarbonyls level (in units of ppbv). Relative contributions from primary emissions, secondary formation, and background dicarbonyls concentrations can be computed according to the tracer concentrations and corresponding  $\beta$ -values by the following equations:

$$P_{\text{primary}} = \frac{\beta_1[\text{C}_2\text{H}_2]i}{(\beta_0 + \beta_1[\text{C}_2\text{H}_2]i + \beta_2[\text{O}_3]i)} \times 100\% \quad (2)$$

$$P_{\text{secondary}} = \frac{\beta_2[\text{O}_3]i}{(\beta_0 + \beta_1[\text{C}_2\text{H}_2]i + \beta_2[\text{O}_3]i)} \times 100\% \quad (3)$$

$$P_{\text{background}} = \frac{\beta_0}{(\beta_0 + \beta_1[\text{C}_2\text{H}_2]i + \beta_2[\text{O}_3]i)} \times 100\% \quad (4)$$

Table S6 the sensitivity test of physical processes

| time  | Gly (ppbv)           |                                |                       | Mgly (ppbv)          |                                |                       |
|-------|----------------------|--------------------------------|-----------------------|----------------------|--------------------------------|-----------------------|
|       | INITIAL <sup>a</sup> | Dry<br>deposition <sup>b</sup> | Dilution <sup>c</sup> | INITIAL <sup>a</sup> | Dry<br>deposition <sup>b</sup> | Dilution <sup>c</sup> |
| 6:00  | 0.004                | 0.004                          | 0.004                 | 0.005                | 0.005                          | 0.005                 |
| 7:00  | 0.017                | 0.017                          | 0.016                 | 0.021                | 0.021                          | 0.020                 |
| 8:00  | 0.036                | 0.036                          | 0.032                 | 0.047                | 0.046                          | 0.045                 |
| 9:00  | 0.072                | 0.071                          | 0.067                 | 0.092                | 0.092                          | 0.088                 |
| 10:00 | 0.140                | 0.138                          | 0.128                 | 0.180                | 0.177                          | 0.169                 |
| 11:00 | 0.224                | 0.220                          | 0.206                 | 0.311                | 0.307                          | 0.291                 |
| 12:00 | 0.309                | 0.300                          | 0.284                 | 0.449                | 0.420                          | 0.419                 |
| 13:00 | 0.364                | 0.354                          | 0.332                 | 0.509                | 0.500                          | 0.473                 |
| 14:00 | 0.400                | 0.392                          | 0.367                 | 0.541                | 0.531                          | 0.498                 |
| 15:00 | 0.393                | 0.379                          | 0.359                 | 0.501                | 0.490                          | 0.459                 |
| 16:00 | 0.373                | 0.359                          | 0.339                 | 0.455                | 0.442                          | 0.416                 |
| 17:00 | 0.376                | 0.361                          | 0.340                 | 0.441                | 0.430                          | 0.400                 |
| 18:00 | 0.365                | 0.350                          | 0.322                 | 0.424                | 0.410                          | 0.384                 |
| 19:00 | 0.353                | 0.336                          | 0.314                 | 0.406                | 0.390                          | 0.367                 |

<sup>a</sup> Data modeled from the INITIAL scenario.

<sup>b</sup> Based on the INITIAL scenario, the dry deposition rate multiplied by two for Gly/Mgly modeled.

<sup>c</sup> Based on the INITIAL scenario, the dilution rate multiplied by two for Gly/Mgly modeled.

Table S7. Absolute and relative changes of Gly mixing ratio, and the contribution of differ aerosol sinks to total heterogeneous loss of Gly under different model simulations for the Heshan site. When the model scenario is changing from A to B, the absolute changes of Gly mixing ratio is calculated as  $\Delta\text{Gly} = B - A$ ; the relative change in percentage is calculated as  $\% = 100 \times \Delta\text{Gly} / A$ .

| Scenario                | Time period | Relative change in Gly |
|-------------------------|-------------|------------------------|
| INITIAL → scenario 1    | 06-12       | -1.70%                 |
|                         | 13-19       | -0.60%                 |
|                         | 06-19       | -1.20%                 |
| Scenario 1 → scenario 2 | 06-12       | -1.40%                 |
|                         | 13-19       | -2.40%                 |
|                         | 06-19       | -1.90%                 |
| Scenario 2 → scenario 3 | 06-12       | -17.3%                 |
|                         | 13-19       | -34.0%                 |
|                         | 06-19       | -25.7%                 |
| Scenario 3 → scenario 4 | 06-12       | -55.0%                 |
|                         | 13-19       | -68.4%                 |
|                         | 06-19       | -61.7%                 |
| INITIAL → scenario 4    | 06-12       | -65.0%                 |
|                         | 13-19       | -79.6%                 |
|                         | 06-19       | -72.3%                 |

Table S8. Absolute and relative changes of Mgly mixing ratio, and the contribution of differ aerosol sinks to total heterogeneous loss of Mgly under different model simulations for the Heshan site. When the model scenario is changing from A to B, the absolute changes of Mgly mixing ratio is calculated as  $\Delta\text{Mgly} = B - A$ ; the relative change in percentage is calculated as  $\% = 100 \times \Delta\text{Mgly} / A$ .

| scenario                  | Time period | Relative change in Mgly |
|---------------------------|-------------|-------------------------|
| INITIAL → scenario M1     | 06-12       | -46.0%                  |
|                           | 13-19       | -36.7%                  |
|                           | 06-19       | -41.3%                  |
| Scenario M1 → scenario M2 | 06-12       | -50.5%                  |
|                           | 13-19       | -60.9%                  |
|                           | 06-19       | -55.7%                  |
| INITIAL → scenario M2     | 06-12       | -61.4%                  |
|                           | 13-19       | -82.6%                  |
|                           | 06-19       | -73.0%                  |

Table S9. The relative contributions of different loss pathways of Gly and Mgly at nighttime

| Loss pathyways                  | Gly  | Mgly |
|---------------------------------|------|------|
| NO <sub>3</sub> ,OH-reaction, % | 2.44 | 3.56 |
| dry deposition, %               | 1.04 | 0.74 |
| dilution, %                     | 1.92 | 1.60 |
| heterogeneous <sup>a</sup> , %  |      |      |
| Irreversible processes, %       | 57.9 | 55.9 |
| Reversible processes, %         | 36.7 | 38.2 |

<sup>a</sup> Considered both irreversible and reversible parameterizations of the aerosol sinks (*i.e.*, scenario 4 and M2).

Table S10. Comparison of the results from this work and previous researches in PRD

|                    | This study                    |                |       |       |                               |              |              |               | Li Nan's study                |      |      |       |
|--------------------|-------------------------------|----------------|-------|-------|-------------------------------|--------------|--------------|---------------|-------------------------------|------|------|-------|
|                    | Gly                           |                | Mgly  |       | Gly                           |              | Mgly         |               | Gly                           |      | Mgly |       |
|                    | $\gamma^a = 1 \times 10^{-3}$ |                |       |       | $\gamma = 2.9 \times 10^{-3}$ |              |              |               | $\gamma = 2.9 \times 10^{-3}$ |      |      |       |
|                    | SOA <sup>b</sup>              | % <sup>c</sup> | SOA   | %     | SOA                           | %            | SOA          | %             | SOA                           | %    | SOA  | %     |
| <i>m,p</i> -Xylene | 0.063                         | 2.6%           | 0.081 | 3.3%  | 0.55<br>0.64 <sup>d</sup>     | 8.0%<br>9.4% | 0.56<br>0.81 | 8.2%<br>11.8% | 0.20                          | 2.2% | 0.23 | 2.5%  |
| <i>o</i> -Xylene   | 0.023                         | 0.93%          | 0.014 | 0.57% | 0.18<br>0.19                  | 2.6%<br>2.8% | 0.09<br>0.13 | 1.3%<br>1.9%  |                               |      |      |       |
| Toluene            | 0.079                         | 3.2%           | 0.019 | 0.77% | 0.63<br>0.77                  | 9.2%<br>11%  | 0.13<br>0.19 | 1.9%<br>2.8%  | 0.16                          | 1.8% | 0.07 | 0.77% |
| SOA <sub>het</sub> | 0.28                          | 11%            | 0.25  | 10%   | 2.1<br>2.5                    | 31%<br>37%   | 2.0<br>2.4   | 29%<br>35%    | 2.33                          | 26%  | 2.51 | 27%   |

<sup>a</sup> Uptake coefficients.

<sup>b</sup> Unit:  $\mu\text{g}/\text{m}^3$ .

<sup>c</sup> The contribution to the total SOA (i.e., SOA<sub>gp</sub>+SOA<sub>het</sub>)

<sup>d</sup> Solely a surface uptake process for aerosol sink marked in red.



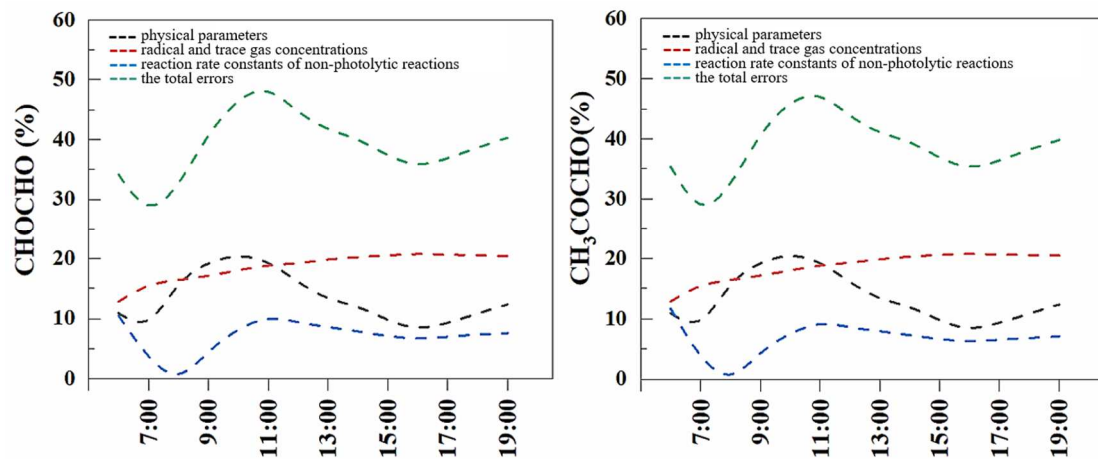

Figure S1. Mean diurnal variation of the uncertainty of the Gly and Mgly concentrations predicted by MCM<sub>v</sub>3.2 model.

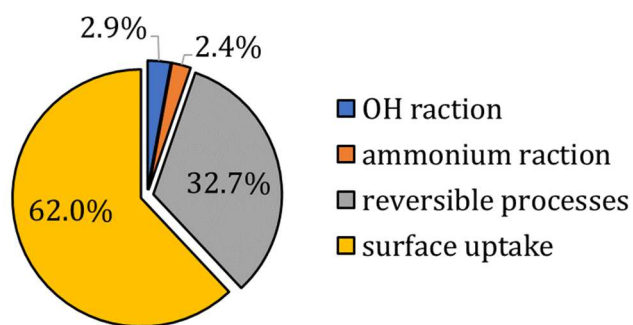

Figure S2. the contribution of differ aerosol sinks is calculated under the scenario 4.

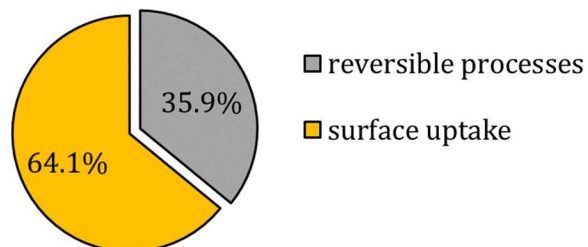

Figure S3. the contribution of differ aerosol sinks is calculated under the scenario M2.

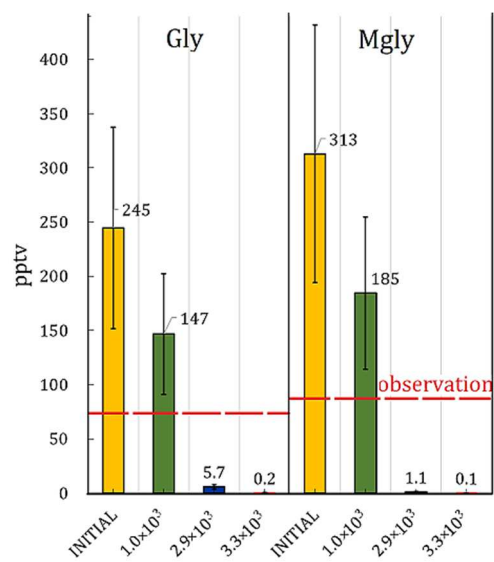

Figure S4. the daily average concentration of Gly and Mgly predicted from INITIAL and surface uptake scenarios (i.e., as INITIAL, and considers surface uptake by aerosols of Mgly and Mgly with the uptake coefficient of  $1.0 \times 10^3$ ,  $2.9 \times 10^3$ ,  $3.3 \times 10^3$ , respectively).

## Section S2. The definition and configuration of each parameter used in equations 4-8

The reversible partitioning of Gly and Mgly on aerosols aqueous phase is usually described by the Henry's law equilibrium (Kampf et al., 2013) (Eq.4):

$$[Gly(Mgly)]_{liquid} = K_H \times [Gly(Mgly)]_{gas} \quad (\text{Eq.4})$$

where  $[Gly(Mgly)]_{liquid}$  and the  $[Gly(Mgly)]_{gas}$  denote the concentration of Gly and Mgly in liquid-phase and gas-phase, respectively, whereas  $K_H$  (mol L<sup>-1</sup> atm<sup>-1</sup>) represents the Henry's law coefficient. Recently laboratorial studies had indicated that hydration of carbonyls function groups and salt-Gly interactions could have significant influences on the  $K_H$  value of Gly (Kampf et al., 2013; Waxman et al., 2015). Thus, an effective Henry's law coefficient expressed by Eq.5 was often used.

$$K_{H, effective} = \frac{K_{H, water}}{10^{(-0.24 \min(12.0, (C_{as} + C_{an})))}} \quad (\text{Eq.5})$$

where  $K_{H, water}$  represents the henry's law constant of Gly observed for water, with value of  $4.19 \times 10^5$  M atm<sup>-1</sup> (Kampf et al., 2013). -0.24 is the "salting-in" constant of ammonium sulfate and nitrate (Kampf et al., 2013; Waxman et al., 2015). The concentrations of ammonium sulfate and nitrate are defined as  $C_{as}$ (M) and  $C_{an}$ (M), respectively. Furthermore, it was suggested that a low increase of  $K_{H, effective}$  could be found at high concentrations of ammonium sulfate and nitrate (*i.e.*, 12 M) within the time scales of their experiments (*i.e.*,  $60 \times 10^3$  s), while the equilibrium for Gly partitioning could be reached rapidly when the concentrations of ammonium sulfate and nitrate were lower (*i.e.*, < 12 M) (Kampf et al., 2013).

As variations were found for the value of  $K_{H, effective}$  under different concentrations of ammonium sulfate and nitrate in previous studies (Erverns and Volkamer, 2010; Knote et al., 2014; Kampf et al., 2013), we calculated this vital parameter (*i.e.*,  $C_{as} + C_{an}$ ) for each hour in the present study. The  $C_{as}$  and  $C_{an}$  were calculated from the measured ammonium sulfate (or ammonium nitrate) concentrations (mol m<sup>-3</sup>) divided by aerosol liquid water content (ALWC, kg m<sup>-3</sup>), which were determined by the aerosol inorganics model (AIM-IV, <http://www.aim.env.uea.ac.uk/aim/model4/model4a.php>)

with inputs of the observed parameters (*e.g.*, ambient relative humidity, temperature, and the moles of each ion) at the Heshan site (Chang et al., 2019).

The reversible formation of monomer (*i.e.*, glyoxal, glyoxal monohydrate, and glyoxal dihydrate) and oligomers are considered with the two important reservoirs (*i.e.*, monomer and oligomer pools, represented as pool1 and pool2 in Knote et al. (2014)). The variations of the glyoxal monomer ( $[Gly_{p1}]$ ) and oligomer concentrations ( $[Gly_{p2}]$ ) with time can be represented based on Erverns and Volkamer, (2010), Kampf et al. (2013) and Knote et al. (2014), as follows:

$$\frac{d([Gly_{p1}])}{dt} = \frac{1}{\tau_1} \times (Gly_{p1,eq} - Gly_{p1}) \quad (\text{Eq.6})$$

$$\frac{d([Gly_{p2}])}{dt} = \frac{1}{\tau_2} \times (Gly_{p2,eq} - Gly_{p2}) \quad (\text{Eq.7})$$

$$\frac{Gly_{p2,eq}}{Gly_{p1,eq}} = K_{olig} \quad (\text{Eq.8})$$

Where  $Gly_{p1}$  and  $Gly_{p2}$  were the current concentrations of Gly in monomers and oligomers pool, respectively.  $Gly_{p1,eq}$  and  $Gly_{p2,eq}$  were the concentrations in each pool at equilibrium, while  $\tau_1$  and  $\tau_2$  were the characteristic time scales to fill the monomer/oligomer pools, respectively.

### Section 3. The validation of SOA simulation by the PBM-MCM model

As there were no direct SOA measurement data such as AMS data, we compared the model simulated SOA concentrations with those calculated by different methods and parameters, to evaluate the performance of SOA simulation.

First, the EC (elemental carbon)-tracer method was used here to estimate the concentration of SOA in the present study, according to the equations 1-2 (Duan et al., 2005):

$$SOC = OC_{tot} - EC \times (OC / EC)_{min} \quad (1)$$

$$SOA = SOC \times Coef_{SOA/SOC} \quad (2)$$

where *SOC* represents the secondary organic carbon; *OC<sub>tot</sub>* represents the measured concentration of total organic carbon;  $(OC/EC)_{min}$  is the emission ratio of primary OC (organic carbon) and EC (elemental carbon) from the sources, and can be represented by the minimum *OC/EC* ratio measured. Based on the  $(OC/EC)_{min}$  value which was derived from the hourly observation data during the simulation period (i.e., January 07-08) using the minimum R squared (MRS) method and the hourly measured OC and EC concentrations (details in Chang et al., 2019), as well as the ratio of *Coef<sub>SOA/SOC</sub>* (Bae et al., 2006; Turpin and Lim, 2001), the mean concentration of SOA calculated by the EC-tracer method was 2.82  $\mu\text{g}/\text{m}^3$ , about 1.2 times the model simulated SOA concentration in the present study (2.47  $\mu\text{g}/\text{m}^3$ ), suggesting that the PBM-MCM model provided a reasonable performance on the simulation of the magnitude of SOA, though uncertainties were frequently observed from the SOA concentrations calculated by the EC-tracer method.

Second, we also conducted the comparison between measurement and simulation on other secondary products, including acetic acid, formic acid and pyruvic acid, which have been recognized as key SOA species, to further evaluate the model performance (Figure 1). It was found that the simulated concentrations of acetic acid, formic acid and pyruvic acid were close to those observed at the Heshan site, accounting for ~80%, 70% and 88% of observed values for acetic acid, formic acid and pyruvic acid, respectively. The results confirmed that secondary formation was the dominant source of above species at the Heshan site, and suggested that the PBM-MCM model could

provide robust performance on simulating the abundance of above secondary species. The deviations between simulated and observed concentrations may be related to the lack of consideration of primary emissions and/or other production pathways of above species in the model. Nevertheless, the above comparisons confirmed that the PBM-MCM model in this study indeed provided an appropriate description on the formation of SOA and other secondary organic products.

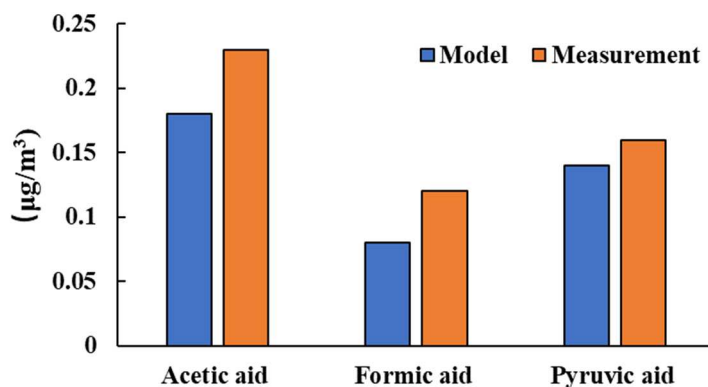

Fig S5. The concentrations of acetic acid, formic acid and pyruvic acid in filter samples

## References

- Bae, M. S., Demerjian, K. L., and Schwab, J. J.: Seasonal estimation of organic mass to organic carbon in PM<sub>2.5</sub> at rural and urban locations in New York state, *Atmos. Environ.*, 40, 7467-7479, 2006.
- Chang, D., Wang, Z., Guo, J., Li, T., Liang, Y. H., Kang, L. Y., Xia, M., Wang, Y., Yu, C., Yun, H., Yue, D. L., and Wang, T.: Characterization of organic aerosols and their precursors in southern China during a severe haze episode in January 2017, *Sci. Total Environ.*, 691, 101-111, 2019.
- Creasey, D. J., Heard, D. E., Lee, J. D.: OH and HO<sub>2</sub> measurements in a forested region of north-western Greece, *Atmos. Environ.*, 35, 4713-4724, 2001.
- Duan, F., He, K., Ma, Y., Jia, Y., Yang, F., Lei, Y., and Okuta, T.: Characteristics of carbonaceous aerosols in Beijing, China, *Chemosphere*, 603, 355-364, 2005.
- Ervens, B., and Volkamer, R.: Glyoxal processing by aerosol multiphase chemistry: towards a kinetic modeling framework of secondary organic aerosol formation in aqueous particles, *Atmos. Chem. Phys.*, 1017, 8219-8244, 2010.
- Friedfeld, S., Fraser, M., Ensor, K., Tribble, S., Rehle, D., Leleux, D., and Tittel, F.: Statistical analysis of primary and secondary atmospheric formaldehyde, *Atmos. Environ.*, 36, 4767-4775, 2002.
- Hofzumahaus, A., Rohrer, F., Lu, K. D., Bohn, B., Brauers, T., Chang, C.-C., Fuchs, H., Holland, F., Kita, K., Kondo, Y., Li, X., Lou, S.R., Shao, M., Zeng, L., Wahner, A., and Zhang, Y. H.: Amplified trace gas removal in the troposphere, *Science*, 324, 1702-1704, 2009.
- Kampf, C. J., Waxman, E. M., Slowik, J. G., Dommen, J., Pfaffenberger, L., Praplan, A. P., André S. H., Baltensperger, U., Hoffmann, T., and Volkamer, R.: Effective Henry's law

- partitioning and the salting constant of glyoxal in aerosols containing sulfate, *Environ. Sci. Technol.*, 47, 4236-4244, 2013.
- Kanaya, Y., Cao, R., Akimoto, H., Fukuda, M., Komazaki, Y., Yokouchi, Y., Koike, M., Tanimoto, H., Takegawa, N., and Kondo, Y.: Urban photochemistry in central Tokyo: 1. Observed and modeled OH and HO<sub>2</sub> radical concentrations during the winter and summer of 2004. *J. Geophys. Res.*, 112(D21), <https://doi.org/10.1029/2007JD008670>, 2007.
- Knote, C., Hodzic, A., Jimenez, J. L., Volkamer, R., Orlando, J. J., Baidar, S., Brioude, J., Fast, J., Gentner, D. R., and Goldstein, A. H.: Simulation of semi-explicit mechanisms of SOA formation from glyoxal in aerosol in a 3-D model, *Atmos. Chem. Phys.*, 14, 6213-6239, 2014.
- Li, X., Rohrer, F., Brauers, T., Hofzumahaus, A., and Wahner, A.: Modeling of HCHO and CHOCHO at a semi-rural site in southern China during the PRIDE-PRD2006 campaign, *Atmos. Chem. Phys.*, 14, 33013-33054.
- Lu, K. D., Rohrer, F., Holland, F., Fuchs, H., Bohn, B., Brauers, T., Chang, C.-C., Häsel, R., Hu, M., Kita, K., Kondo, Y., Li, X., Lou, S. R., Nehr, S., Shao, M., Zeng, L. M., Wahner, A., and Zhang, Y. H., Hofzumahaus, A.: Observation and modelling of OH and HO<sub>2</sub> concentrations in the Pearl River Delta 2006: a missing OH source in a VOC rich atmosphere, *Atmos. Chem. Phys.*, 12, 1541-1569, 2012.
- Ma, X., Tan, Z., Lu, K., Yang, X., Liu, Y., Li, S., Li, X., Chen, S., Novelli, A., Cho, C., and Zeng, L.: Winter photochemistry in Beijing: Observation and model simulation of OH and HO<sub>2</sub> radicals at an urban site, *Sci. Total Environ.*, 685, 85-95, 2019.
- Nan, J., Wang, S., Guo, Y., Xiang, Y., and Zhou, B.: Study on the daytime OH radical and implication for its relationship with fine particles over megacity of Shanghai, China, *Atmos. Environ.*, 154, 167-178, 2017.
- Pye, H. O. T., Murphy, B. N., Xu, L., Ng, N. L., Carlton, A. G., and Guo, H.: On the implications of aerosol liquid water and phase separation for organic aerosol mass, *Atmos. Chem. Phys.*, 17, 343-369, 2017.
- Ren, X., Brune, W. H., Mao, J., Mitchell, M. J., Leshner, R. L., Simpas, J. B., Metcalf, A. R., Schwab, J. J., Cai, C., Li, Y., and Demerjian, K. L.: Behavior of OH and HO<sub>2</sub> in the winter atmosphere in New York City, *Atmos. Environ.* 40, 252-263, 2006.
- Tan, Z., Lu, K., Hofzumahaus, A., Fuchs, H., Bohn, B., Holland, F., Liu, Y., Rohrer, F., Shao, M., Sun, K. and Wu, Y.: Experimental budgets of OH, HO<sub>2</sub>, and RO<sub>2</sub> radicals and implications for ozone formation in the Pearl River Delta in China 2014, *Atmos. Chem. Phys.*, 19, 7129-7159, 2019.
- Turpin, B. J., and Lim, H. J.: Species contributions to PM<sub>2.5</sub> mass concentrations: Revisiting common assumptions for estimating organic mass, *Aerosol Sci Technol.*, 35, 602-610, 2001.
- Waxman, E. M., Elm, J., Kurtén, T., Mikkelsen, K. V., Ziemann, P. J., and Volkamer, R.: Glyoxal and methylglyoxal setschenow salting constants in sulfate, nitrate, and chloride solutions: Measurements and Gibbs energies, *Environ. Sci. Technol.*, 49, 11500-11508.
- Yuan, B., Hu, W. W., Shao, M., Wang, M., Chen, W. T., Lu, S. H., Zeng, L. M., and Hu, M.: VOC emissions, evolutions and contributions to SOA formation at a receptor site in eastern China, *Atmos. Chem. Phys.*, 13, 8815-8832.
